# Supplementary material for: Formation of polyphenyl chains through hierarchical reactions: Ullmann coupling followed by cross-dehydrogenative coupling
Source: Royal Society of Chemistry journal article supplement (doi:10.1039/c4cc07953a), 2014-11-19
Supplement: c4cc07953a1.pdf [file c4cc07953a1.pdf]

**Formation of polyphenyl chains through hierarchical  
reactions: Ullmann coupling followed by cross-  
dehydrogenative coupling**  
*Supporting information*

**Chi Zhang, Qiang Sun, Hua Chen, Qinggang Tan, and Wei Xu\***

*Tongji-Aarhus Joint Research Center for Nanostructures and Functional Nanomaterials and  
College of Materials Science and Engineering, Tongji University, Caoan Road 4800, Shanghai  
201804, P. R. China*

E-mail: [xuwei@tongji.edu.cn](mailto:xuwei@tongji.edu.cn)

Experimental and computational methods:

The STM experiments were performed in a UHV chamber (base pressure  $1 \times 10^{-10}$  mbar) equipped with a variable-temperature “Aarhus-type” STM using electrochemically etched W tips purchased from SPECS<sup>1,2</sup>, a molecular evaporator and standard facilities for sample preparation. After the system was thoroughly degassed, the 4-bromobiphenyl molecules (purchased from TCI, purity >95%) were deposited by thermal sublimation (at 300 K with cooling water) onto the Cu(110) and Ag(110) substrates, respectively. The sample was thereafter transferred within the UHV chamber to the STM, where measurements were carried out at  $\sim 150$  K. All the calculations were carried out in the framework of DFT by using the Vienna ab-initio simulation package (VASP)<sup>3,4</sup>. The projector augmented wave method was used to describe the interaction between ions and electrons<sup>5,6</sup>. We employed the PBE-GGA as the exchange correlation functional<sup>7</sup> and van der Waals interactions were included using the DFT-D2 method of Grimme<sup>8</sup>. We have chosen an energy cut-off value of 400 eV. We chose a  $20 \times 40 \times 15$  extended supercell that had been checked to be big enough to avoid interactions between the molecules and a  $2 \times 1 \times 2$  k-point grid determined by the Monkhorst-Pack method was used. The atomic structures were relaxed using the conjugate gradient algorithm scheme as implemented in the VASP code until the forces on all unconstrained atoms were  $\leq 0.03$  eV/Å.

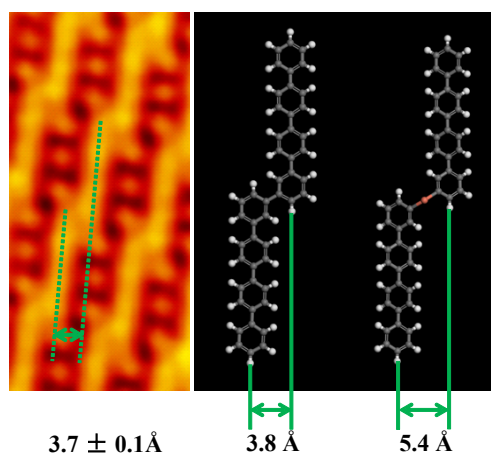

Figure S1. The comparison of the theoretical models of direct C-C coupling and C-Cu-C interlinking indicates a good agreement between the direct C-C coupling and the experimental lateral offset of the polyphenyl chain.

Figure S2. (a) The large-scale STM image and (b) the close-up STM image showing the formation of disordered chains after further annealing the Cu(110) sample to 525 K. Scanning conditions:  $I_t = 0.90$  nA,  $V_t = -1200$  mV.

Figure S3. (a) The large-scale STM image and (b) the close-up STM image showing the formation of disordered short chains after further annealing the Ag(110) sample to the temperature window ranging from 500 K to 525 K. Scanning conditions:  $I_t = 0.70$  nA,  $V_t = -1200$  mV.

## References

- 1 F. Besenbacher, *Rep. Prog. Phys.*, 1996, **59**, 1737.
- 2 E. Lægsgaard, L. Österlund, P. Thstrup, P. B. Rasmussen, I. Stensgaard and F. Besenbacher, *Rev. Sci. Instrum.*, 2001, **72**, 3537.
- 3 G. Kresse and J. Hafner, *Phys. Rev. B*, 1993, **48**, 13115.
- 4 G. Kresse and J. Furthmüller, *Phys. Rev. B*, 1996, **54**, 11169.
- 5 P. E. Blöchl, *Phys. Rev. B*, 1994, **50**, 17953.
- 6 G. Kresse and D. Joubert, *Phys. Rev. B*, 1999, **59**, 1758.
- 7 J. P. Perdew, K. Burke and M. Ernzerhof, *Phys. Rev. Lett.*, 1996, **77**, 3865.
- 8 S. Grimme, *J. Comput. Chem.*, 2006, **27**, 1787.
